# Reverse phase protein array identification of triple-negative breast cancer subtypes and comparison with mRNA molecular subtypes

Hiroko Masuda<sup>1,2,4</sup>, Yuan Qi<sup>3</sup>, Shuying Liu<sup>1</sup>, Naoki Hayashi<sup>1</sup>, Takahiro Kogawa<sup>1,2</sup>, Gabriel N. Hortobagyi<sup>1</sup>, Debu Tripathy<sup>1</sup> and Naoto T. Ueno<sup>1,2</sup>

<sup>1</sup>Department of Breast Medical Oncology, The University of Texas MD Anderson Cancer Center, Houston, TX, USA

<sup>2</sup>Morgan Welch Inflammatory Breast Cancer Research Program and Clinic, The University of Texas MD Anderson Cancer Center, Houston, TX, USA

<sup>3</sup>Department of Bioinformatics and Computational Biology, The University of Texas MD Anderson Cancer Center, Houston, TX, USA

<sup>4</sup>Department of Breast Surgical Oncology, Showa University Hospital, Tokyo, Japan

**Correspondence to:** Naoto T. Ueno, **email:** nueno@mdanderson.org

**Keywords:** triple-negative breast cancer, molecular subtype, functional, proteomics, mRNA microarray

**Received:** October 19, 2016

**Accepted:** June 27, 2017

**Published:** July 31, 2017

**Copyright:** Masuda et al. This is an open-access article distributed under the terms of the Creative Commons Attribution License 3.0 (CC BY 3.0), which permits unrestricted use, distribution, and reproduction in any medium, provided the original author and source are credited.

## ABSTRACT

**Background:** Reverse phase protein array (RPPA) analysis, allows investigation of potential targets at the functional protein level. We identified TNBC subtypes at the protein level using RPPA and compared them with mRNA molecular subtypes (TNBCtype, TNBCtype-4, and PAM50) that is unique in its availability of both RPPA and mRNA analyses.

**Methods:** We classified the samples from 80 TNBC patients using both k-means and hierarchical consensus clustering analysis and performed Ingenuity Pathway Analysis. We also investigated whether we could reproduce the mRNA molecular subtypes using the RPPA dataset.

**Results:** Both clustering methods divided all samples into 2 clusters that were biologically the same. The top canonical pathways included inflammation, hormonal receptors, and MAPK signaling pathways for the first cluster ["inflammation and hormonal-related (I/H) subtype"] and the GADD45, DNA damage, and p53 signaling pathways for the second cluster ["DNA damage (DD)-related subtype"]. Further k-means cluster analysis identified 5 TNBC clusters. Comparison between sample classification using the 5 RPPA-based k-means cluster subtypes and 6 gene-expression-based TNBCtype molecular subtypes showed significant association between the 2 classifications ( $p = 0.017$ ).

**Conclusions:** The I/H and DD subtypes identified by RPPA advance our understanding of TNBC's heterogeneity from the functional proteomic perspective.

## INTRODUCTION

Triple-negative breast cancer (TNBC) is not a simple, homogeneous breast cancer subtype; it collectively describes cancers that do not express the well-known target receptors estrogen receptor (ER), progesterone receptor (PR), and HER2. Varied research has evaluated TNBC's

heterogeneity, establishing a consensus that TNBC is not a single entity but rather a biologically heterogeneous group [1–6]. In order to divide the heterogeneous TNBC into homogeneous subtypes, several groups have used gene expression analysis, an approach that allows comprehensive investigation of more than 20,000 genes and their expression patterns. Several TNBC subtype

classifications have been derived by clustering analysis using gene expression patterns, such as PAM50 intrinsic subtypes [2, 6, 7], claudin-low subtype [8], Burstein et al's 4 subtypes [9], and Lehmann and colleagues' molecular subtypes [4, 10]. The weakest point of gene expression analysis is that we cannot evaluate the genes' active status. Additional barriers to daily clinical use of gene expression analysis are its difficult methods of analysis and poor reproducibility.

In contrast, reverse phase protein array (RPPA) analysis could be easily adapted to the clinical setting for evaluating subtypes because it allows investigation of potential targets at the protein level and could lead to the development of immunohistochemical assays [11–13]. A further strength of RPPA is that it reflects protein function; proteins are the most actionable and druggable cellular components. Thus, we sought to determine whether functional proteomics can define molecular subtypes and accelerate personalized medicine. In this study, we used RPPA data for 80 TNBC patients to identify subtypes at the protein level, assessed the biological features of each subtype using Ingenuity Pathway Analysis (IPA), and compared duration of patient survival by subtype. For the 57 samples for which we have RPPA and mRNA analyses (a unique dataset), we also investigated whether there is correlation between the RPPA subtypes and the subtypes derived from messenger RNA (mRNA) analysis. Comparing these 2 modalities provides complementary information that compensates for the drawbacks of each: gene expression profiling does not allow evaluation of the genes' function and activation status, while RPPA technology does not show the extent of proteome coverage, as there are generally fewer than 200 analytes. We here have created a valuable dataset in that both mRNA and RPPA analyses are available for the same 57 patient samples. According to our search, The Cancer Genome Atlas (TCGA) is the only other public dataset that has the same information.

## RESULTS

### Identification of 2 stable RPPA TNBC subtypes

The University of Texas MD Anderson Cancer Center previously created an RPPA database using samples from MD Anderson's frozen breast tissue tumor bank; 80 patients from that dataset had triple-negative primary invasive ductal or invasive lobular breast carcinoma (n=3). For the current analysis, we first performed 2 types of clustering analysis, k-means and hierarchical, to classify the TNBCs into different molecular subtypes using the RPPA data. From both clustering analyses, we identified 2 stable clusters (Figure 1A) that were significantly different from each other (SigClust  $p = 0.012$ ). Clusters of  $k = 2$  from both

clustering methods showed exactly the same subtypes (Supplementary Table 1), indicating that these 2 clusters were stable and sufficiently different.

Protein signatures that were significant differentially expressed between the clusters were identified (Figure 1A, 1B and Table 1). Ingenuity pathway analysis of the protein signatures showed that the top canonical pathways associated with one of the clusters included the inflammation, hormonal receptor, and MAPK signaling pathways; we designated this cluster as the "I/H-related subtype". The canonical pathways associated with the other cluster included the Growth Arrest and DNA Damage (GADD45), DNA damage, and p53 signaling pathways; we designated this cluster as the "DD-related subtype" (Tables 1 and 2, Figures 2 and 3). The significant pathways were detected by IPA with highly significant  $p$ -values ( $10^{-6} - 10^{-12}$ ).

We next compared whether these subtypes predict disease-free survival (DFS) and overall survival (OS). Kaplan-Meier analysis showed that patients' OS and DFS rates, The I/H-related subtype showed better survival, but the differences between the two clusters were not significant. (DFS:  $p = 0.3$ ; OS:  $p = 0.1$ ) (Supplementary Figure 1).

### Further identification of RPPA TNBC subtypes and comparison with mRNA-derived subtypes

In order to determine whether there is a positive correlation between mRNA and proteomic classifications, we compared the RPPA subtypes and Lehmann et al's original 6 mRNA molecular subtypes [4]. The latter 6 subtypes--basal-like 1 (BL1), basal-like 2 (BL2), immunomodulatory (IM), mesenchymal (M), mesenchymal stem-like (MSL), and luminal androgen receptor (LAR)--and an additional unstable (UNS) group were identified in 2011 on the basis of gene ontologies and differential gene expression [4], and we have confirmed these subtypes using the same methodology [14]. We also showed the correlation between these 6 subtypes and pathologic complete response [14]. In 2016, Lehmann et al published a preliminary analysis refining the subtypes to 4 [10]. However, further definition of these subtypes is needed before they can be exploited for targeted therapy or prognostic prediction in a clinical setting. Thus, we focused on k-means clustering analysis, which was originally used to identify the 6 subtypes. Consensus clustering with the k-means clustering method for each round was carried out to identify clusters in the RPPA dataset. Core samples for each cluster were selected based on positive silhouette width for each cluster, indicating the samples were closer to samples of the same cluster than to samples in other clusters. The total number of samples was reduced to 74 core samples.

Consensus k-means clustering analysis of the core samples allowed us to further identify 5 clusters

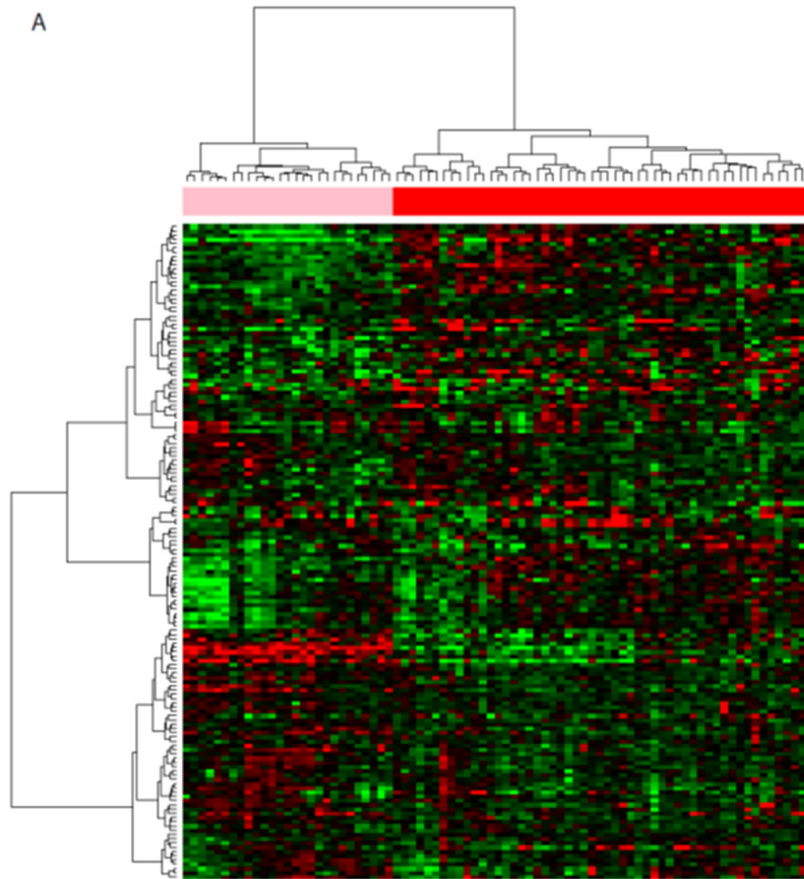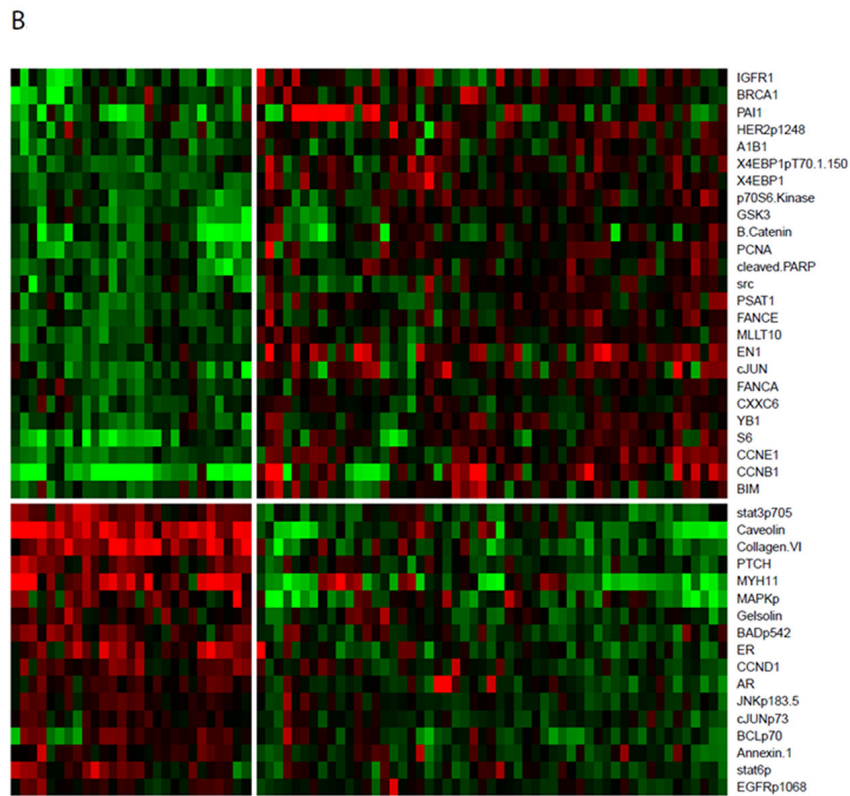

**Figure 1: (A)** Heatmap of unsupervised hierarchical clustering of TNBC samples with all protein expression data. Unsupervised k-means clustering separated samples into the same 2 clusters. **(B)** Heatmap showing the relative expression level of the 42 significantly differentially expressed proteins between the 2 stable subtypes.

(Table 3) in the RPPA data statistically (Figure 4). The heatmap for the clustered consensus matrix (Figure 5A) clearly shows 5 compact groups of samples frequently clustered together along the diagonal. Five was selected as the optimal cluster number as it is at the point in which the relative change in area under the cumulative distribution function (CDF) plot did not differ from random changes with increasing cluster number (Supplementary Figures 2 and 3).

These 5 clusters are further divisions of the previous 2 clusters we identified (DD-related subtype, clusters 1, 2, 3; I/H-related subtype, clusters 4, 5) (Figure 5), with the exception of only 1 sample.

Comparison between sample classification using the 5 RPPA-based k-means clusters (1-5) and Lehmann et al's 6 gene-expression-based molecular subtypes showed significant association (Fisher's exact test,  $p = 0.017$ ) (Table 4A). Subtype BL2 was RPPA cluster 1-like ( $p = 0.037$ ), meaning most BL2 tumors were in cluster 1, although cluster 1 contained other subtypes. Cluster 2 was BL1-like ( $p = 0.002$ ), and cluster 4 was MSL-like ( $p = 0.005$ ). All BL1 and BL2 patients belonged to the DD-related subtype, indicating that the basal subtype showed high reproducibility regardless of the modality we used to identify these subtypes.

However, when we focused on each cluster, the most correlation was seen in only the BL1/2 subtypes, and we couldn't identify the 6 molecular subtypes using functional proteomics analysis.

Lehmann et al refined TNBC molecular subtypes from 6 (TNBCtype) into 4 (TNBCtype-4) tumor-specific subtypes (BL1, BL2, M, and LAR) because they found significant evidence that the IM and MSL TNBC subtypes represent tumors with substantial numbers of infiltrating lymphocytes and tumor-associated mesenchymal cells, respectively. [10]

In order to investigate the biological features of our 5 RPPA clusters more accurately and determine the positive correlation with mRNA molecular subtypes, we also compared our 5 RPPA clusters with TNBCtype-4. When the RPPA clusters were compared with TNBCtype-4, there was a marginal significant association (Fisher's exact test,  $p = 0.07$ ) (Table 4B). Focused on each subtype, RPPA cluster 2 was enriched in TNBCtype-4 subtype BL1 ( $p = 0.006$ ), and TNBCtype-4 subtype BL2 was enriched in RPPA cluster 1 ( $p = 0.043$ ). There was no significant association between the TNBCtype-4 LAR or TNBCtype-4 M subtypes and the RPPA clusters.

We also compared our 5 RPPA cluster with the PAM50 subtypes, reported by Perou et al. [2, 6, 15, 16],

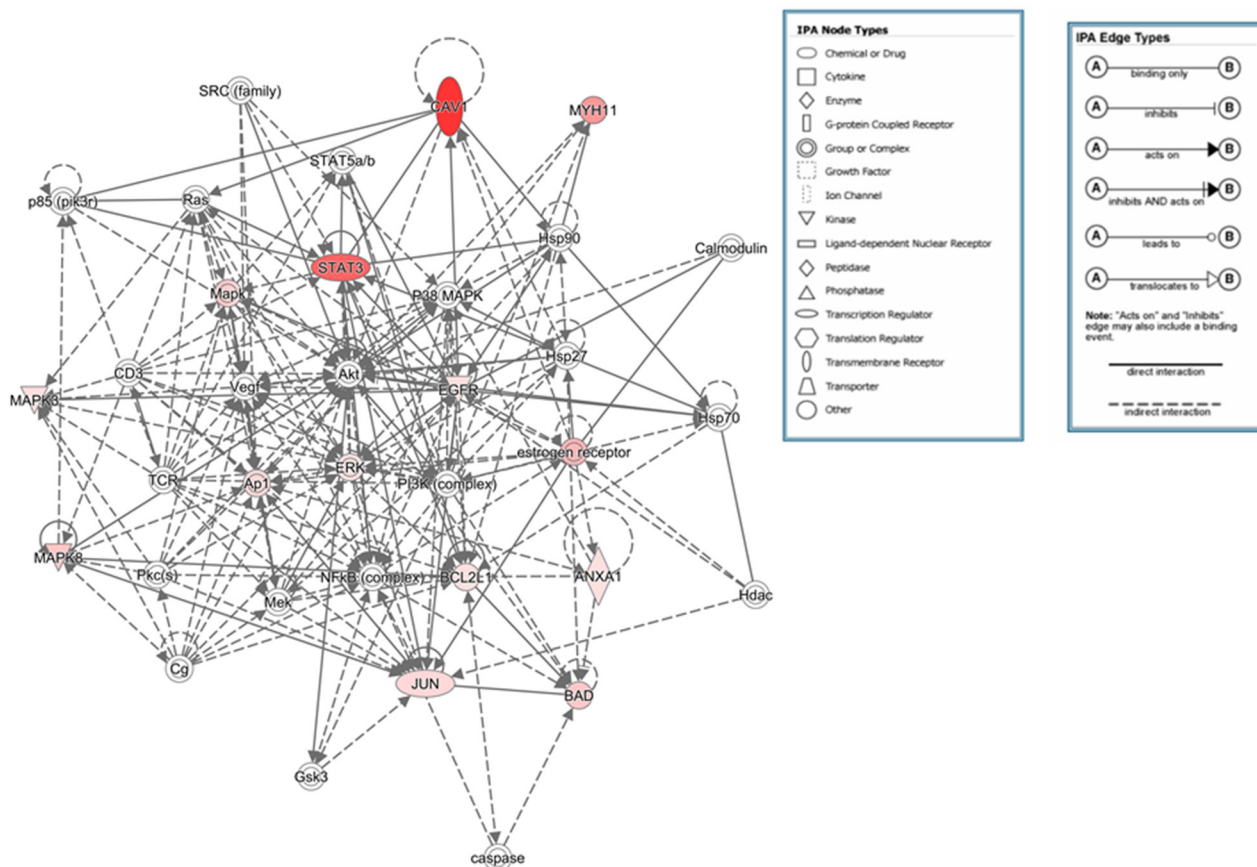

**Figure 2: Top networks for the I/H-related subtype.** The genes in our list are labelled in red, indicating upregulation. The depth of color reflects the degree of upregulation; the deeper the color, the more upregulated the gene is.

which is well known and accepted in the clinical setting. When compared with the PAM50 classification, RPPA cluster 2 was enriched in the basal subtype ( $p = 0.046$ ), and RPPA cluster 4 was enriched in the normal-like subtype ( $p = 0.011$ ) (Table 4C).

The OS rates significantly differed between the 5 RPPA clusters (log-rank test,  $p = 0.002$ ). However, this result was affected by patient characteristics; most patients with T4 disease belonged to clusters 2 and 1 (Supplementary Figure 2). The DFS plot did not show a significant difference between subtypes (Supplementary Figure 2). We listed the pattern of protein expression in each of the 5 RPPA clusters (Supplementary File 1).

## DISCUSSION

In this study, we identified 2 major stable clusters using functional proteomics, and pathway analysis identified the biological features of these 2 groups as DD-related and I/H-related subtypes. Two types of clustering analysis produced the same results; thus, these clusters can be considered promising and stable. When compared with the mRNA molecular subtypes, RPPA cluster 1 and mRNA subtype BL-2 (in both the TNBC 6 subtype and TNBCtype-4 classifications), and RPPA cluster 2 and BL1 (in both TNBC 6 subtype and TNBCtype-4), showed strong positive correlation, and most of these tumors

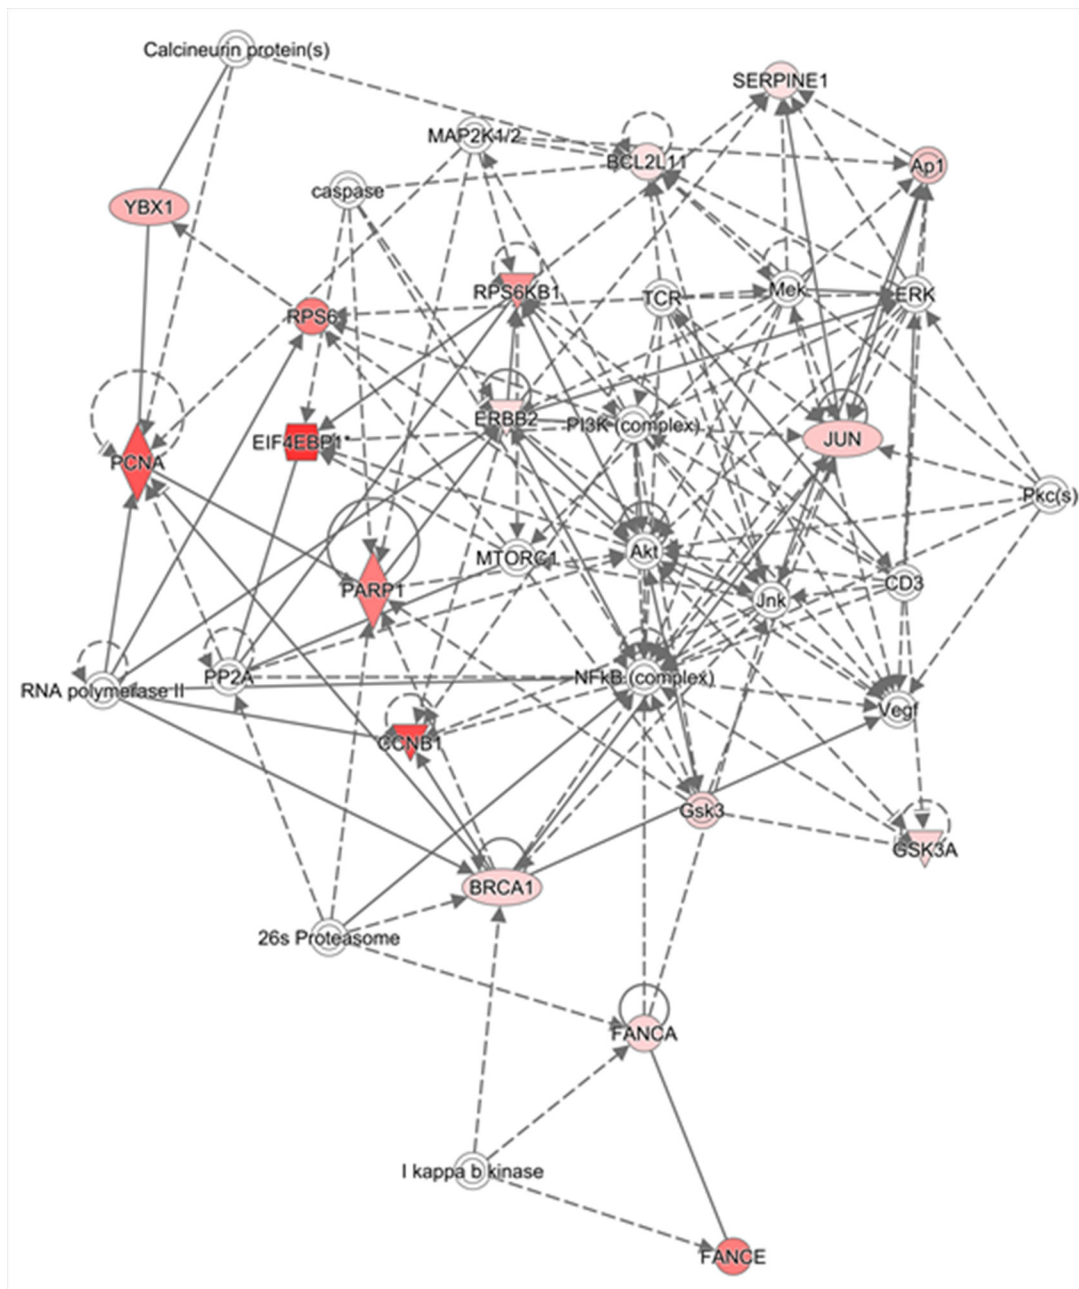

**Figure 3: Top networks for the DD-related subtype.** See Figure 2 for description.

**Table 1: Antibodies that were significantly differentially expressed between the 2 clusters identified by k-means and hierarchical clustering analysis of the RPPA results**

| Antibody name                                                 | Protein name                                  | Gene symbol | Adjusted Bonferroni p-value |
|---------------------------------------------------------------|-----------------------------------------------|-------------|-----------------------------|
| <b>Higher expression in inflammation and hormonal subtype</b> |                                               |             |                             |
| Caveolin 1                                                    | Caveolin 1                                    | CAV1        | 3.05E-10                    |
| Collagen VI                                                   | Collagen VI                                   | COL6A1      | 1.29E-09                    |
| stat3pS705                                                    | stat3 phosphorylation at S705                 | STAT3       | 3.02E-08                    |
| MYH11                                                         | MYH11                                         | MYH11       | 3.28E-06                    |
| PTCH                                                          | Patche                                        | PTCH1       | 6.58E-06                    |
| ER                                                            | Estrogen receptor alpha                       | ESR1        | 4.89E-05                    |
| JNKpT183/<br>Y185                                             | JNK phosphorylation at T183/Y185              | MAPK8       | 0.000201828                 |
| BADp542                                                       | BAD phosphorylation at 542                    | BAD         | 0.000212416                 |
| c-JUNpS73                                                     | cjun N terminal kinase phosphorylation at S73 | JUN         | 0.000986419                 |
| AR                                                            | Androgen receptor                             | AR          | 0.001376863                 |
| CCND1                                                         | Cyclin D1                                     | CCND1       | 0.002897264                 |
| stat6pY641                                                    | stat6 phosphorylation at Y641                 | STAT6       | 0.006211527                 |
| MAPKp                                                         | MAPK phosphorylation                          | MAPK3       | 0.007085294                 |
| Annexin.1                                                     | Annexin A1                                    | ANXA1       | 0.009194289                 |
| BCLpS70                                                       | bcl2 phosphorylation at S70                   | BCL2L1      | 0.026207531                 |
| Gelsolin                                                      | Gelsolin                                      | GSN         | 0.028422688                 |
| EGFRpY1068                                                    | EGFR phosphorylation at Y1068                 | EGFR        | 0.029595161                 |
| <b>Higher expression in DNA damage-related subtype</b>        |                                               |             |                             |
| 4EBP1                                                         | 4E blinding protein1                          | EIF4EBP1    | 4.49E-08                    |
| CCNE1                                                         | Cyclin E1                                     | CCNE1       | 9.18E-08                    |
| CCNB1                                                         | Cyclin B1                                     | CCNB1       | 2.55E-07                    |
| PCNA                                                          | Proliferating cell nuclear antigen            | PCNA        | 5.72E-07                    |
| S6                                                            | S6 ribosomal protein                          | RPS6        | 7.82E-06                    |
| Cleaved PARP                                                  | Cleaved PARP                                  | PARP1       | 8.28E-06                    |
| FANCE                                                         | Fanconi anemia, complementation group E       | FANCE       | 8.28E-06                    |
| p70 S6 Kinase                                                 | p70 S6 Kinase                                 | RPS6KB1     | 3.17E-05                    |
| MILLT10                                                       | MILLT10                                       | MLLT10      | 4.16E-05                    |
| 4EBP1pT70                                                     | 4EBP1 phosphorylation at T70                  | EIF4EBP1    | 0.000141                    |
| YB1                                                           | Y-box binding protein 1                       | YBX1        | 0.000274                    |
| cJUN                                                          | cJUN                                          | JUN         | 0.001139                    |
| A1B1                                                          | Amplified in breast cancer 1                  | A1B1        | 0.001443                    |
| PSAT1                                                         | PSAT1                                         | PSAT1       | 0.002198                    |
| BRCA1                                                         | BRCA1                                         | BRCA1       | 0.002525                    |
| GSK3                                                          | Glycogen synthase kinase 3 beta               | GSK3A       | 0.002525                    |

(Continue)

| Antibody name | Protein name                            | Gene symbol | Adjusted Bonferroni p-value |
|---------------|-----------------------------------------|-------------|-----------------------------|
| IGFR1         | Insulin-like growth factor receptor 1   | IGFR1       | 0.002525                    |
| FANCA         | Fanconi anemia, complementation group A | FANCA       | 0.002525                    |
| EN1           | Engrailed-1                             | EN1         | 0.002644                    |
| HER2pY1248    | HER2 phosphorylation at Y1248           | ERBB2       | 0.004761                    |
| βCatenin      | Beta catenin                            | CTNNB1      | 0.007731                    |
| PAI1          | Plasminogen activator inhibitor-1       | SERPINE1    | 0.013501                    |
| BIM           | BIM                                     | BCL2L11     | 0.013501                    |
| CXXC6         | CXXC6                                   | TET1        | 0.021359                    |
| Src           | Src                                     | SRC         | 0.047705                    |

Shown are antibodies that were expressed at higher levels in the inflammation and hormonal subtype compared with the DNA damage-related subtype (top) and vice versa (bottom). A nonparametric Kruskal-Wallis test was used to identify proteins that were significantly differentially expressed. Proteins with an adjusted p-value by the Bonferroni method of less than 0.05 were considered significant.

**Table 2: Top canonical pathways identified by Ingenuity Pathway Analysis (IPA) for each cluster**

| Cluster                           | Top canonical pathways                                                                                                                                                    |
|-----------------------------------|---------------------------------------------------------------------------------------------------------------------------------------------------------------------------|
| Inflammation and hormonal subtype | Pancreatic Adenocarcinoma Signaling<br>Colorectal Cancer Metastasis Signaling<br>Glucocorticoid Receptor Signaling<br>UVB-Induced MAPK Signaling<br>ErbB2-ErbB3 Signaling |
| DNA damage-related subtype        | GADD45 Signaling<br>Molecular Mechanisms of Cancer<br>DNA Damage-Induced 14-3-3 Signaling<br>Neuregulin Signaling<br>p53 Signaling                                        |

Shown are the canonical pathways significantly associated with each cluster when the samples were divided into 2 clusters by k-means and hierarchical clustering. The significant pathways were detected by IPA with highly significant p-values ( $10^{-6}$  -  $10^{-12}$ ).

belonged to the DD-related RPPA subtype and the basal-like PAM50 subtype, indicating that the basal and non-basal subtypes showed high reproducibility regardless of the modality used to identify them. However, we couldn't discriminate the other molecular subtypes using functional proteomics analysis. The results may indicate that classification is discordant for different modalities such as functional proteomics analysis and mRNA molecular analysis or that some subtypes described by mRNA are not reliable.

The two identified subtypes suggest the potential for different treatment strategies. From the DD-related subtype's biological features, platinum agents such as cisplatin and carboplatin could potentially have efficacy for this subtype due to overexpression of cell cycle and DNA damage response gene signatures. For the I/H-related

subtype, androgen receptor (AR) showed high expression and IPA identified hormonal signaling pathways. As previously suggested by Burstein et al's and Lehmann et al's findings, even within TNBC there is a subtype that shows high expression of ER and AR [4, 9]. The Cancer Genome Atlas (TCGA) Network analyzed breast cancers using RPPA and defined a luminal tumor subtype that showed high ER, AR, and BCL2 protein expression [17]. Thus, the I/H-related subtype has a similar biology to that of the luminal subtype and AR inhibitor may have potential to treat this subtype. Further, MAPK or Stat3 signaling was another top canonical pathway for the I/H-related subtype; thus, anti-inflammatory drugs such as COX2 inhibitors, which inhibit MAPK or Stat3 signaling [18–20], have potential to be targeted drugs for this subtype. We believe that defining subtypes will enable

development of subtype-specific targeted therapies and accelerate personalized medicine.

For the DD-related subtype, the top canonical pathways were GADD45 Signaling, Molecular Mechanisms of Cancer, and DD-Induced 14-3-3 signaling. In this subtype, basal-like feature genes, such as CCNE1, PARP1, and BRCA1, showed high expression.

Interestingly, STAT3, JNK, and cJUN were highly expressed in luminal and our I/H-related subtype, and these proteins have an important role in inflammation. Moreover, the MAPK signaling pathway was one of the top canonical pathways of the I/H-related subtype because of the high expression of JUN, BAD, MAPK3, MAPK8, BCL2L1 and EGFR proteins. Thus, the biological features of this subtype also include inflammation. We showed high protein expression of caveolin-1 and collagen VI in the I/H-related subtype, but as the TCGA group reported, it is possible that these proteins were not specific to tumor but

were produced by the microenvironment and/or cancer-activated fibroblasts [17].

Functional proteomics classification also indicated 2 types of basal subtype; especially notable was that 4 of the 5 BL2 patients in the TNBCtype-4 classification belonged to RPPA cluster 1. Further, cluster 1 (similar to BL2) showed high levels of FGFR and PI3K-AKT signaling pathway-related proteins. Our previous study also showed differences in pathologic complete response rates for patients with the 2 basal subtypes (BL1 was associated with the highest pCR rate and BL2 the lowest) even though basal-like subtype in intrinsic subtype reported favorable chemosensitivity, might be related to the expression of growth factors and proliferation genes [14]. When we compared the RPPA clusters with the PAM50 classification, all RPPA cluster 2 (similar to BL1) tumors belonged to the basal-like subtype, but not all RPPA cluster 1 (similar to BL2) tumors did. Thus, functional proteomics

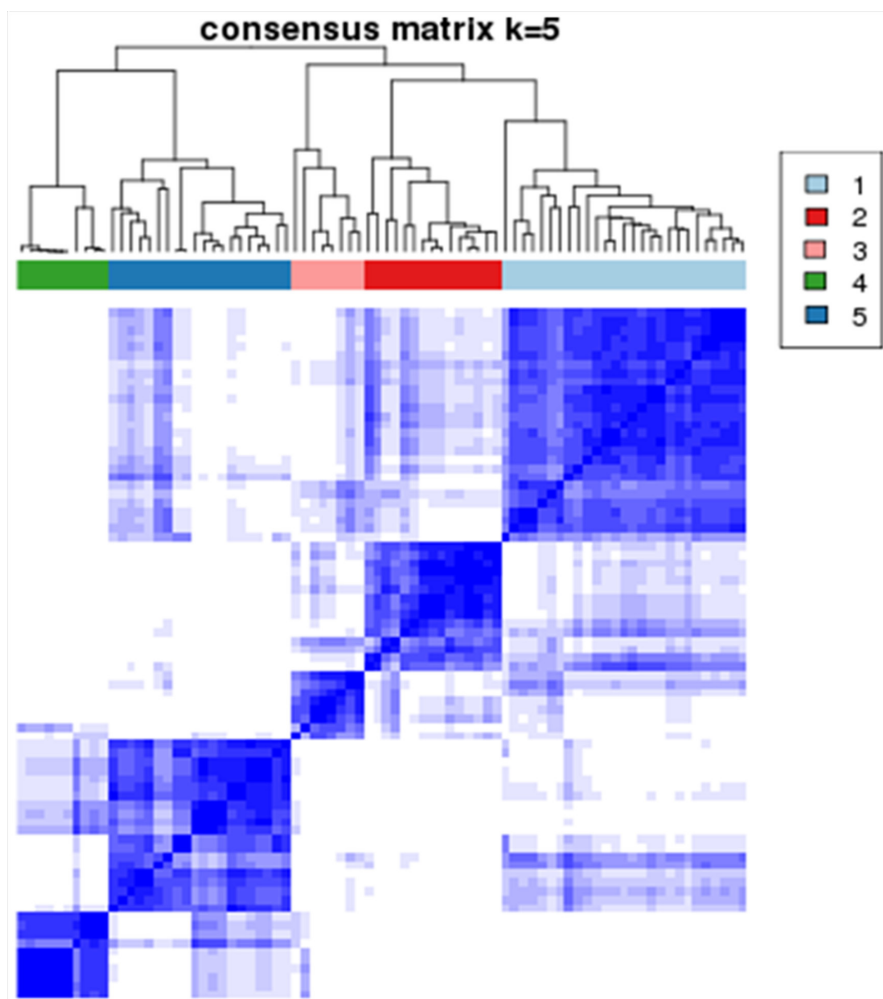

**Figure 4: Consensus clustering analysis results displaying the robustness of sample classification using multiple iterations of k-means clustering.** In this heatmap of the clustered consensus matrix, rows and columns of the matrix both indicate samples. The darkness of color in the heatmap represents how frequent 2 samples are clustered together. The darker, the more frequent. This heatmap clearly shows a pattern of 5 compact groups of samples frequently clustered together along the diagonal. The color bar on top indicates 5 clusters of samples.



**Table 3: Patient characteristics for the full cohort (74 core samples) and the 5 clusters identified by k-means analysis of the RPPA dataset**

|                              |                | Entire cohort | Cluster 1 | Cluster 2 | Cluster 3 | Cluster 4 | Cluster 5 | P-value |
|------------------------------|----------------|---------------|-----------|-----------|-----------|-----------|-----------|---------|
| Total no. of patients        |                | 74            | 27        | 13        | 7         | 9         | 18        |         |
| Age                          | ≤50 years      | 37            | 12        | 7         | 3         | 5         | 10        | 0.937   |
|                              | >50 years      | 37            | 15        | 6         | 4         | 4         | 8         |         |
| Menopausal status            | Premenopausal  | 44            | 16        | 7         | 5         | 6         | 10        | 0.941   |
|                              | Postmenopausal | 30            | 11        | 6         | 2         | 3         | 8         |         |
| Tumor T classification       | T0             | 1             | 0         | 0         | 1         | 0         | 0         | 0.03    |
|                              | T1             | 18            | 5         | 2         | 1         | 3         | 7         |         |
|                              | T2             | 37            | 18        | 5         | 1         | 5         | 8         |         |
|                              | T3             | 9             | 2         | 1         | 3         | 0         | 3         |         |
|                              | T4             | 8             | 2         | 4         | 1         | 1         | 0         |         |
| Lymph node metastasis status | Unknown        | 1             | 0         | 1         | 0         | 0         | 0         | 0.943   |
|                              | Negative       | 40            | 14        | 8         | 3         | 5         | 10        |         |
|                              | Positive       | 33            | 13        | 5         | 4         | 4         | 7         |         |
| Nuclear grade                | Unknown        | 1             | 0         | 0         | 0         | 0         | 1         | 0.428   |
|                              | 1              | 1             | 0         | 0         | 0         | 0         | 1         |         |
| Noadjuvant chemotherapy      | 2              | 6             | 2         | 0         | 1         | 0         | 3         | 0.65    |
|                              | 3              | 67            | 25        | 13        | 6         | 9         | 14        |         |
| Adjuvant chemotherapy        | No             | 45            | 16        | 7         | 3         | 7         | 12        | 0.667   |
|                              | Yes            | 29            | 11        | 6         | 4         | 2         | 6         |         |
| Noadjuvant radiotherapy      | No             | 30            | 13        | 4         | 4         | 3         | 6         | 0.047   |
|                              | Yes            | 44            | 14        | 9         | 3         | 6         | 12        |         |
| Adjuvant radiotherapy        | No             | 71            | 26        | 13        | 5         | 9         | 18        | 0.223   |
|                              | Yes            | 3             | 1         | 0         | 2         | 0         | 0         |         |
| Adjuvant radiotherapy        | No             | 26            | 8         | 5         | 3         | 6         | 4         | 0.223   |
|                              | Yes            | 48            | 19        | 8         | 4         | 3         | 14        |         |

P-values are the result of ANOVA test (for age as a continuous variable) or Fisher's exact test (for all other categorical clinical variables) comparing each clinical variable between the 5 clusters.

could possibly be used to identify the chemotherapy-resistant subset of the basal-like type. It is truly requisite for TNBC patients that some patients showed progressive disease during neoadjuvant chemotherapy.

Only one other report has classified TNBC using proteomics. Lawrence et al. reported the proteomic landscape of TNBC in 2015 [21]; they performed quantitative proteomics analysis of 20 human-derived breast cell lines and 4 primary breast tumors to a depth of more than 12,000 distinct proteins. They identified 2 overarching groups containing 4 clusters using hierarchical clustering analysis. They determined genetic abnormalities in each cluster and compared them with the mRNA classification, then labeled these clusters as luminal,

basal-like 2, basal-like 1, and mesenchymal-like/ Claudin-low subtypes. The results were similar to ours in that they also identified 2 basal-like subtypes. However, when they focused on the cancer-signaling proteins associated with each subtype, they found that despite overall concordance of whole proteome profiles with various cellular phenotypes, in most cases the expression of particular cancer proteins was not uniformly characteristic of one subtype or another.

Over the past 15 years, several mRNA expression-guided TNBC classifications have been reported. Some parts of these molecular classifications are biologically similar, have high reproducibility, and have shown clinical relevance, and thus we are beginning to understand true

TNBC subtypes on the basis of their specific biology, but the various subtypes do not match perfectly across classifications. Further refinement is needed before these methodologies can be adapted into daily practice. Current barriers to use of mRNA-guided subtyping include 1) the complicated analysis, which requires a high level of skill; 2) the low reproducibility; and 3) the need to confirm true

clinical relevance. Moreover, since among TNBCs we have not yet found target genes as clear and consistent as ER, PR, and HER2, currently we have to investigate a huge number of genes' expression and mutations and identify subtypes according to their distributions and relationships. Because gene expression takes the form of continuous variables, clinical application relies heavily on the interpretation of

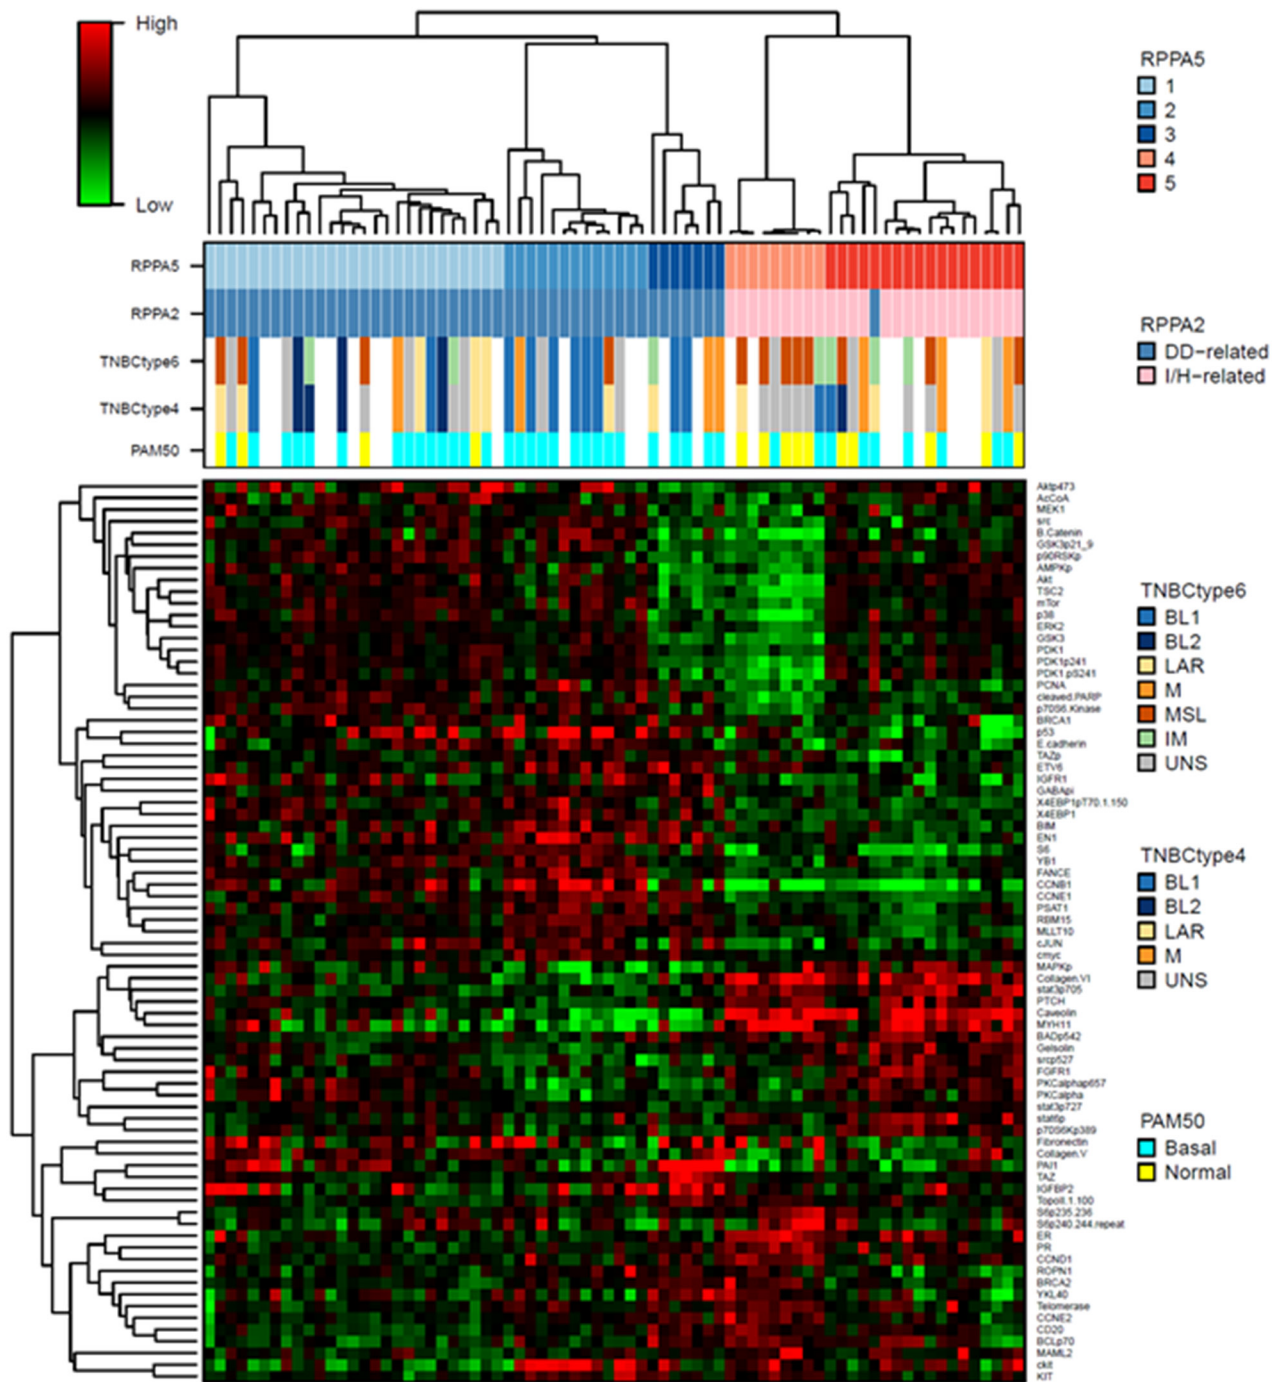

**Figure 5: Heatmap of the RPPA 5-cluster-based signature proteins.** The dendrogram on top shows the consensus clustering of the 74 core RPPA samples. Classifications of these samples using different methods are shown below the dendrogram. The proteins shown are the 77 PAM signature proteins for the 5 RPPA clusters, with median centered expression values.

**Table 4A: Comparison of sample classification according to 5 RPPA clusters and 6 gene-expression-based TNBC subtypes for the 52 patients with available data**

| RPPA cluster | BL1 | BL2 | IM | LAR | M | MSL | UNS | p-value |
|--------------|-----|-----|----|-----|---|-----|-----|---------|
| 1            | 2   | 3   | 2  | 3   | 1 | 3   | 4   | 0.017   |
| 2            | 6   | 0   | 0  | 0   | 1 | 1   | 2   |         |
| 3            | 2   | 0   | 1  | 0   | 2 | 0   | 0   |         |
| 4            | 0   | 0   | 1  | 0   | 0 | 5   | 1   |         |
| 5            | 0   | 0   | 3  | 1   | 3 | 3   | 2   |         |

P-value shown is the result of Fisher's exact test for association between the 2 classification results.

Significantly enriched:

BL2 was enriched in RPPA-cluster-1 ( $p = 0.037$ )

RPPA cluster 2 was enriched in BL1 ( $p = 0.002$ ).

RPPA cluster 4 was enriched in MSL ( $p = 0.005$ ).

**Table 4B: Comparison of sample classification according to 5 RPPA clusters and 4 gene-expression-based TNBC subtypes for the 52 patients with available data**

| RPPA cluster | BL1 | BL2 | LAR | M | UNS | p-value |
|--------------|-----|-----|-----|---|-----|---------|
| 1            | 2   | 4   | 5   | 1 | 6   | 0.07    |
| 2            | 6   | 0   | 1   | 1 | 2   |         |
| 3            | 2   | 0   | 1   | 2 | 0   |         |
| 4            | 1   | 0   | 1   | 0 | 5   |         |
| 5            | 1   | 1   | 2   | 3 | 5   |         |

P-value shown is the result of Fisher's exact test for association between the 2 classification results.

Significantly enriched:

RPPA cluster 2 was enriched in TNBCtype4 BL1 ( $p = 0.006$ ).

TNBCtype4 BL2 was enriched in RPPA cluster 1 ( $p = 0.043$ ).

**Table 4C: Comparison of sample classification according to 5 RPPA clusters and PAM50 subtypes for the 52 patients with available data**

| RPPA cluster | Basal | Normal-like |
|--------------|-------|-------------|
| 1            | 14    | 4           |
| 2            | 10    | 0           |
| 3            | 5     | 0           |
| 4            | 2     | 5           |
| 5            | 7     | 5           |

Significantly enriched:

RPPA cluster 2 was enriched in the basal subtype ( $p = 0.046$ ).

RPPA cluster 4 was enriched in the normal-like subtype ( $p = 0.011$ )

data to establish thresholds, with the risk of subjectivity [17]. Thus, there is a risk of classifying TNBC subtypes based on chance rather than their true clinical and/or biological differences. Others have noted the need to classify cancers not only according to their molecular

profiles but also based on their response to therapies. Given these current approaches, in order to adapt these findings to clinical practice, we still have many challenges.

Confirming the subtype findings using multiple modalities is one solution to determine highly credible

subtypes. As we seek to adapt subtypes into clinical practice, proteomics has the potential to overcome the inability of gene analysis to investigate biological features directly. Through the comprehensive analysis of protein expression levels and activation statuses, proteomics can enable investigation of cancer pathogenesis and biology and can lead to the development of immunohistochemical assays. We tested 154 total and phosphorylated proteins in this study; of those we selected 42 proteins to identify 2 clusters and 61 proteins to identify 5 clusters, this is still a large number of proteins for clinical practice, but it has potential to be accepted in daily clinical practice compared with mRNA expression. The RPPA approach permits, with just a small amount of material, quantification of the expression level and modification of proteins as a continuous value for a large number of patients [11].

The identification of homogeneous TNBC subtypes is not as simple as classifying ER-positive breast cancer, due to the lack of powerful biomarkers that distinguish each subtype. We need not only to identify strong biomarkers but also a biology-oriented comprehensive approach to identify optimal TNBC subtypes that improve the success rate of new targeted therapies due to optimal patient selection and result in better prognosis. However, we still do not know the optimal modality for identifying the subtypes and how to interpret the discordance that arises in identifying subtypes using different methods [22]. Our study is an important first step to defining the differences between the results of proteomic and mRNA classification and clarifying the issues involved in establishing a standard classification method using functional proteomics.

However, there were several limitations of this study. First, the samples were collected retrospectively, and thus clinical situations may have led to bias in terms of factors such as treatment selection and the duration of sample storage. Although the number is not big enough to statistically affect our findings, there are 3 lobular cancer patients included in this study. Second, as noted above, the RPPA did not cover all of the proteins corresponding to the genes of the mRNA expression assays. Third, the merit of functional proteomics in investigating phosphorylation disappeared in the course of our pathway analysis because we converted both total and phosphorylated proteins to the same gene symbol. These limitations might have prevented us from identifying more specific TNBC subtypes. For example, our subtype encompassing inflammation- and hormonal-related biological features couldn't distinguish these 2 features.

We believe that functional proteomics is one of the strategies that will help us to achieve the goal of overcome TNBC heterogeneity and explore personalized medicine. A strength of our study is that we had data for both mRNA and RPPA analysis in the same patients so that we were able to compare and validate the modalities' concordance. Although we found some discordance between the mRNA

and proteomic classifications, our study confirmed that both methods divide basal and non-basal subtypes and showed potential for distinguishing more detailed TNBC subtypes such as basal 1 and 2 and the inflammation and hormonal subtype. For future investigation, collection of multiple specimens for patients over time is needed, even for patients receiving standard care in community clinics, in order to accelerate personalized therapy development in TNBC based on biology-oriented comprehensive approaches. These efforts could improve the sensitivity, specificity, and predictive power of TNBC subtypes and yield optimal treatment for these heterogeneous breast cancers.

## MATERIALS AND METHODS

### Patient samples

As described in our group's previous publication [23], the tumor samples for the RPPA database were obtained from biopsies from patients with primary invasive ductal or invasive lobular breast carcinoma who underwent surgery prior to any systemic therapy between June 1992 and March 2007 at MD Anderson Cancer Center. Patients with ductal carcinoma in situ, metaplastic carcinoma, or sarcoma were excluded. All specimens were collected and analyzed under institutional review board approval. The current analysis consisted of the 80 patients from that dataset who had TNBC.

### RPPA data

RPPA analysis was performed in our laboratory as described previously [13, 23–25]. Briefly, tumor lysates were normalized to 1  $\mu\text{g}/\mu\text{L}$  concentration using a bicinchoninic acid assay. The lysates were then boiled with 1% sodium dodecyl sulfate, and the supernatants were manually diluted in 6 or 8 2-fold serial dilutions with lysis buffer. An Aushon Biosystems 2470 arrayer was used to create sample arrays from the serial dilutions on nitrocellulose-coated FAST slides (Schleicher & Schuell BioScience, Inc.). The slides were analyzed and protein expression quantitated with the use of Microvigene software (VigeneTech Inc., Carlisle, MA).

The RPPA dataset consists of expression levels for 108 full proteins as well as 46 phosphorylated (phospho) proteins, and these data were normalized using the load-control method. The RPPA data before and after load-control normalization are provided in Supplementary Files 2 and 3. The antibody names of the RPPA dataset (whether full proteins or phosphoproteins) were mapped to HGNC (HUGO Gene Nomenclature Committee) gene symbols and used in downstream pathway analysis. There were 112 unique gene symbols for the RPPA dataset. The different forms of antibodies (full proteins or multiple phosphorylated proteins) for each gene symbol were treated as multiple probes measuring for the same gene.

## Matching mRNA expression data

Fifty-two of the 74 RPPA TNBC core samples had matching mRNA expression profiles. Core samples for each cluster were selected based on positive silhouette width for each cluster, indicating the samples were closer to samples of the same cluster than to samples in other clusters.

The mRNA expression data were measured using Affymetrix microarray HG-U133A. The robust multi-array analysis (RMA) method was used to normalize the mRNA expression data, and BioConductor package hgu133a.db was used to annotate probe sets. Genes with multiple probe sets were collapsed by taking the mean.

## Clinical data

As described previously [23], clinical data were extracted from MD Anderson's Breast Cancer Management System database. HER2 levels were evaluated as continuous variables by RPPA analysis rather than as positive or negative by immunohistochemistry and/or fluorescence in situ hybridization.

## Statistical analysis

Consensus clustering with k-means and hierarchical clustering methods was carried out using the R package ConsensusClusterPlus [26] to identify clusters in the RPPA dataset. Core samples for each cluster were selected based on positive silhouette width for each cluster. Signature genes of the clusters were identified using the PAM method [27], at a median false discovery rate of 0.01. For the initial 2 large clusters, the k-means and hierarchical clustering were carried out using R packages kmeans and ClassDiscovery: Mosaic (<http://bioinformatics.mdanderson.org/main/OOMPA:Overview>). A nonparametric Kruskal-Wallis test was used to identify proteins that were significantly differentially expressed. Proteins with an adjusted p-value of less than 0.05 using the Bonferroni method were considered significant. Significance testing between clusters were carried out using R package SigClust [28]. Kaplan-Meier plots were used for overall survival (OS) and disease-free survival (DFS) analysis. ANOVA and Fisher's exact test were used to compare clinical variables between clusters. Association testing between the samples' classifications by RPPA-based clusters and gene-expression-based subtypes was also carried out using Fisher's exact test.

QIAGEN's Ingenuity pathway analysis (IPA<sup>®</sup>, QIAGEN Redwood City, <http://www.ingenuity.com/>) was used to identify canonical pathways that were significantly associated with each cluster. The IPA program collapsed all protein forms ("total" and "phosphorylated") into unique gene symbols by using the maximal value among the different forms.

The normalized and annotated gene expression data were fed to the online server TNBCtype ([\[cbc.mc.vanderbilt.edu/tNBC/prediction.php\]\(http://cbc.mc.vanderbilt.edu/tNBC/prediction.php\)\) to predict molecular subtypes in these TNBC samples. The algorithm for predicting the updated TNBCtype-4 subtypes was obtained from Brian Lehmann \(Vanderbilt-Ingram Cancer Center\). Samples classified as IM or MSL were reassigned to subtype BL1, BL2, M, or LAR to which highest correlation was obtained using the 6-subtype output. Samples with p-value greater than 0.05 or a difference in correlation coefficients between the highest and 2<sup>nd</sup>-highest subtypes of less than 0.05 were assigned as "UNS" \(unstable\). We implemented this algorithm using R. The normalized gene expression data were also used to predict PAM50 subtype \[16\].](http://</a></p></div><div data-bbox=)

## CONFLICTS OF INTEREST

The authors declare no conflicts of interest.

## GRANT SUPPORT

Naoto T. Ueno is supported by the Morgan Welch Inflammatory Breast Cancer Research Program and a State of Texas Rare and Aggressive Breast Cancer Research Program Grant. This work was also supported by the NIH/NCI under award number P30CA016672 and used the Bioinformatics Shared Resource and the Clinical Trials Support Resource.

## REFERENCES

1. Carey LA, Dees EC, Sawyer L, Gatti L, Moore DT, Collichio F, Ollila DW, Sartor CI, Graham ML, Perou CM. The triple negative paradox: primary tumor chemosensitivity of breast cancer subtypes. *Clin Cancer Res.* 2007; 13: 2329-34. <https://doi.org/10.1158/1078-0432.CCR-06-1109>.
2. Perou CM, Sorlie T, Eisen MB, van de Rijn M, Jeffrey SS, Rees CA, Pollack JR, Ross DT, Johnsen H, Akslen LA, Fluge O, Pergamenschikov A, Williams C, et al. Molecular portraits of human breast tumours. *Nature.* 2000; 406: 747-52. <https://doi.org/10.1038/35021093>.
3. Cheang MC, Voduc D, Bajdik C, Leung S, McKinney S, Chia SK, Perou CM, Nielsen TO. Basal-like breast cancer defined by five biomarkers has superior prognostic value than triple-negative phenotype. *Clin Cancer Res.* 2008; 14: 1368-76. <https://doi.org/10.1158/1078-0432.CCR-07-1658>.
4. Lehmann BD, Bauer JA, Chen X, Sanders ME, Chakravarthy AB, Shyr Y, Pietenpol JA. Identification of human triple-negative breast cancer subtypes and preclinical models for selection of targeted therapies. *J Clin Invest.* 2011; 121: 2750-67. <https://doi.org/10.1172/JCI45014>.
5. Nielsen TO, Hsu FD, Jensen K, Cheang M, Karaca G, Hu Z, Hernandez-Boussard T, Livasy C, Cowan D, Dressler L, Akslen LA, Ragaz J, Gown AM, et al. Immunohistochemical and clinical characterization of the basal-like subtype of

- invasive breast carcinoma. *Clin Cancer Res.* 2004; 10: 5367-74. <https://doi.org/10.1158/1078-0432.CCR-04-0220>.
6. Sorlie T, Perou CM, Tibshirani R, Aas T, Geisler S, Johnsen H, Hastie T, Eisen MB, van de Rijn M, Jeffrey SS, Thorsen T, Quist H, Matese JC, et al. Gene expression patterns of breast carcinomas distinguish tumor subclasses with clinical implications. *Proc Natl Acad Sci U S A.* 2001; 98: 10869-74. <https://doi.org/10.1073/pnas.191367098>.
  7. Prat A, Adamo B, Cheang MC, Anders CK, Carey LA, Perou CM. Molecular characterization of basal-like and non-basal-like triple-negative breast cancer. *Oncologist.* 2013; 18: 123-33. <https://doi.org/10.1634/theoncologist.2012-0397>.
  8. Prat A, Parker JS, Karginova O, Fan C, Livasy C, Herschkowitz JI, He X, Perou CM. Phenotypic and molecular characterization of the claudin-low intrinsic subtype of breast cancer. *Breast Cancer Res.* 2010; 12: R68. <https://doi.org/10.1186/bcr2635>.
  9. Burstein MD, Tsimelzon A, Poage GM, Covington KR, Contreras A, Fuqua SA, Savage MI, Osborne CK, Hilsenbeck SG, Chang JC, Mills GB, Lau CC, Brown PH. Comprehensive genomic analysis identifies novel subtypes and targets of triple-negative breast cancer. *Clin Cancer Res.* 2015; 21: 1688-98. <https://doi.org/10.1158/1078-0432.CCR-14-0432>.
  10. Lehmann BD, Jovanovic B, Chen X, Estrada MV, Johnson KN, Shyr Y, Moses HL, Sanders ME, Pietenpol JA. Refinement of triple-negative breast cancer molecular subtypes: implications for neoadjuvant chemotherapy selection. *PLoS One.* 2016; 11: e0157368. <https://doi.org/10.1371/journal.pone.0157368>.
  11. Tibes R, Qiu Y, Lu Y, Hennessy B, Andreeff M, Mills GB, Kornblau SM. Reverse phase protein array: validation of a novel proteomic technology and utility for analysis of primary leukemia specimens and hematopoietic stem cells. *Mol Cancer Ther.* 2006; 5: 2512-21. <https://doi.org/10.1158/1535-7163.MCT-06-0334>.
  12. Hu J, He X, Baggerly KA, Coombes KR, Hennessy BT, Mills GB. Non-parametric quantification of protein lysate arrays. *Bioinformatics.* 2007; 23: 1986-94. <https://doi.org/10.1093/bioinformatics/btm283>.
  13. Gonzalez-Angulo AM, Stemke-Hale K, Palla SL, Carey M, Agarwal R, Meric-Berstam F, Traina TA, Hudis C, Hortobagyi GN, Gerald WL, Mills GB, Hennessy BT. Androgen receptor levels and association with PIK3CA mutations and prognosis in breast cancer. *Clin Cancer Res.* 2009; 15: 2472-8. <https://doi.org/10.1158/1078-0432.CCR-08-1763>.
  14. Masuda H, Baggerly KA, Wang Y, Zhang Y, Gonzalez-Angulo AM, Meric-Bernstam F, Valero V, Lehmann BD, Pietenpol JA, Hortobagyi GN, Symmans WF, Ueno NT. Differential response to neoadjuvant chemotherapy among 7 triple-negative breast cancer molecular subtypes. *Clin Cancer Res.* 2013; 19: 5533-40. <https://doi.org/10.1158/1078-0432.CCR-13-0799>.
  15. Sorlie T, Tibshirani R, Parker J, Hastie T, Marron JS, Nobel A, Deng S, Johnsen H, Pesich R, Geisler S, Demeter J, Perou CM, Lonning PE, et al. Repeated observation of breast tumor subtypes in independent gene expression data sets. *Proc Natl Acad Sci U S A.* 2003; 100: 8418-23. <https://doi.org/10.1073/pnas.0932692100>.
  16. Parker JS, Mullins M, Cheang MC, Leung S, Voduc D, Vickery T, Davies S, Fauron C, He X, Hu Z, Quackenbush JF, Stijleman IJ, Palazzo J, et al. Supervised risk predictor of breast cancer based on intrinsic subtypes. *J Clin Oncol.* 2009; 27: 1160-7. <https://doi.org/10.1200/JCO.2008.18.1370>.
  17. Cancer Genome Atlas Network. Comprehensive molecular portraits of human breast tumours. *Nature.* 2012; 490: 61-70. <https://doi.org/10.1038/nature11412>.
  18. Schonthal AH. Direct non-cyclooxygenase-2 targets of celecoxib and their potential relevance for cancer therapy. *Br J Cancer.* 2007; 97: 1465-8. <https://doi.org/10.1038/sj.bjc.6604049>.
  19. Casanova I, Parreno M, Farre L, Guerrero S, Cespedes MV, Pavon MA, Sancho FJ, Marcuello E, Trias M, Mangués R. Celecoxib induces anoikis in human colon carcinoma cells associated with the deregulation of focal adhesions and nuclear translocation of p130Cas. *Int J Cancer.* 2006; 118: 2381-9. <https://doi.org/10.1002/ijc.21662>.
  20. Ding H, Han C, Guo D, Wang D, Duan W, Chen CS, D'Ambrosio SM. Sensitivity to the non-COX inhibiting celecoxib derivative, OSU03012, is p21(WAF1/CIP1) dependent. *Int J Cancer.* 2008; 123: 2931-8. <https://doi.org/10.1002/ijc.23895>.
  21. Lawrence RT, Perez EM, Hernandez D, Miller CP, Haas KM, Irie HY, Lee SI, Blau CA, Villen J. The proteomic landscape of triple-negative breast cancer. *Cell Rep.* 2015; 11: 630-44. <https://doi.org/10.1016/j.celrep.2015.03.050>.
  22. de Gramont A, Watson S, Ellis LM, Rodon J, Tabernero J, Hamilton SR. Pragmatic issues in biomarker evaluation for targeted therapies in cancer. *Nat Rev Clin Oncol.* 2015; 12: 197-212. <https://doi.org/10.1038/nrclinonc.2014.202>.
  23. Hayashi N, Manyam GC, Gonzalez-Angulo AM, Niikura N, Yamauchi H, Nakamura S, Hortobagyi GN, Baggerly KA, Ueno NT. Reverse-phase protein array for prediction of patients at low risk of developing bone metastasis from breast cancer. *Oncologist.* 2014; 19: 909-14. <https://doi.org/10.1634/theoncologist.2014-0099>.
  24. Hennessy BT, Lu Y, Poradosu E, Yu Q, Yu S, Hall H, Carey MS, Ravoori M, Gonzalez-Angulo AM, Birch R, Henderson IC, Kundra V, Mills GB. Pharmacodynamic markers of perifosine efficacy. *Clin Cancer Res.* 2007; 13: 7421-31. <https://doi.org/10.1158/1078-0432.CCR-07-0760>.
  25. Hayashi N, Iwamoto T, Gonzalez-Angulo AM, Ferrer-Lozano J, Lluch A, Niikura N, Bartholomeusz C, Nakamura S, Hortobagyi GN, Ueno NT. Prognostic impact of phosphorylated HER-2 in HER-2+ primary breast cancer. *Oncologist.* <https://doi.org/10.1634/theoncologist.2010-0409>.

26. Wilkerson MD, Hayes DN. ConsensusClusterPlus: a class discovery tool with confidence assessments and item tracking. *Bioinformatics*. 2010; 26: 1572-3. <https://doi.org/10.1093/bioinformatics/btq170>.
27. Tibshirani R, Hastie T, Narasimhan B, Chu G. Diagnosis of multiple cancer types by shrunken centroids of gene expression. *Proc Natl Acad Sci U S A*. 2002; 99: 6567-72. <https://doi.org/10.1073/pnas.082099299>.
28. Liu Y, Hayes DN, Nobel A, Marron JS. Statistical significance of clustering for high-dimension, low-sample size data. *J Am Stat Assoc*. 2008; 103: 1281-93. <https://doi.org/10.1198/016214508000000454>.
